# Supplementary material
Source: Springer Nature journal article supplement (https://www.springermedizin.de/resource/supplementary/13002_2012_285_MOESM3_ESM.pdf/9627564)

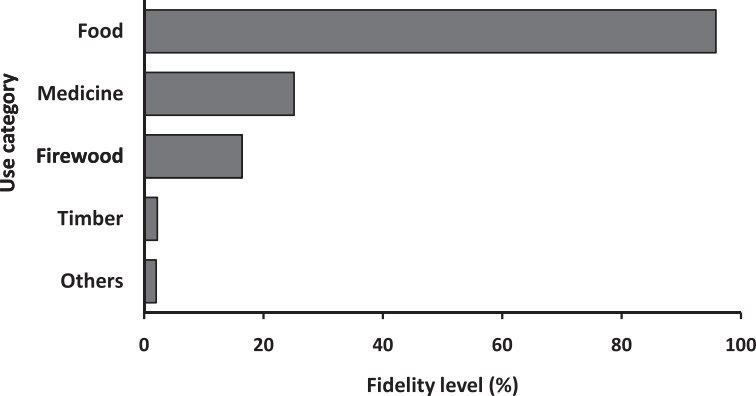

Supplement: MOESM3 [file 9627564]
